# Supplementary material for: The role of wobble uridine modifications in +1 translational frameshifting in eukaryotes
Source: PubMed Central journal article supplement (PMC4627075; doi:10.1093/nar/gkv832), 2015-08-17
Supplement: supp_gkv832_nar-02186-r-2015-File006.pdf [file supp_gkv832_nar-02186-r-2015-File006.pdf]

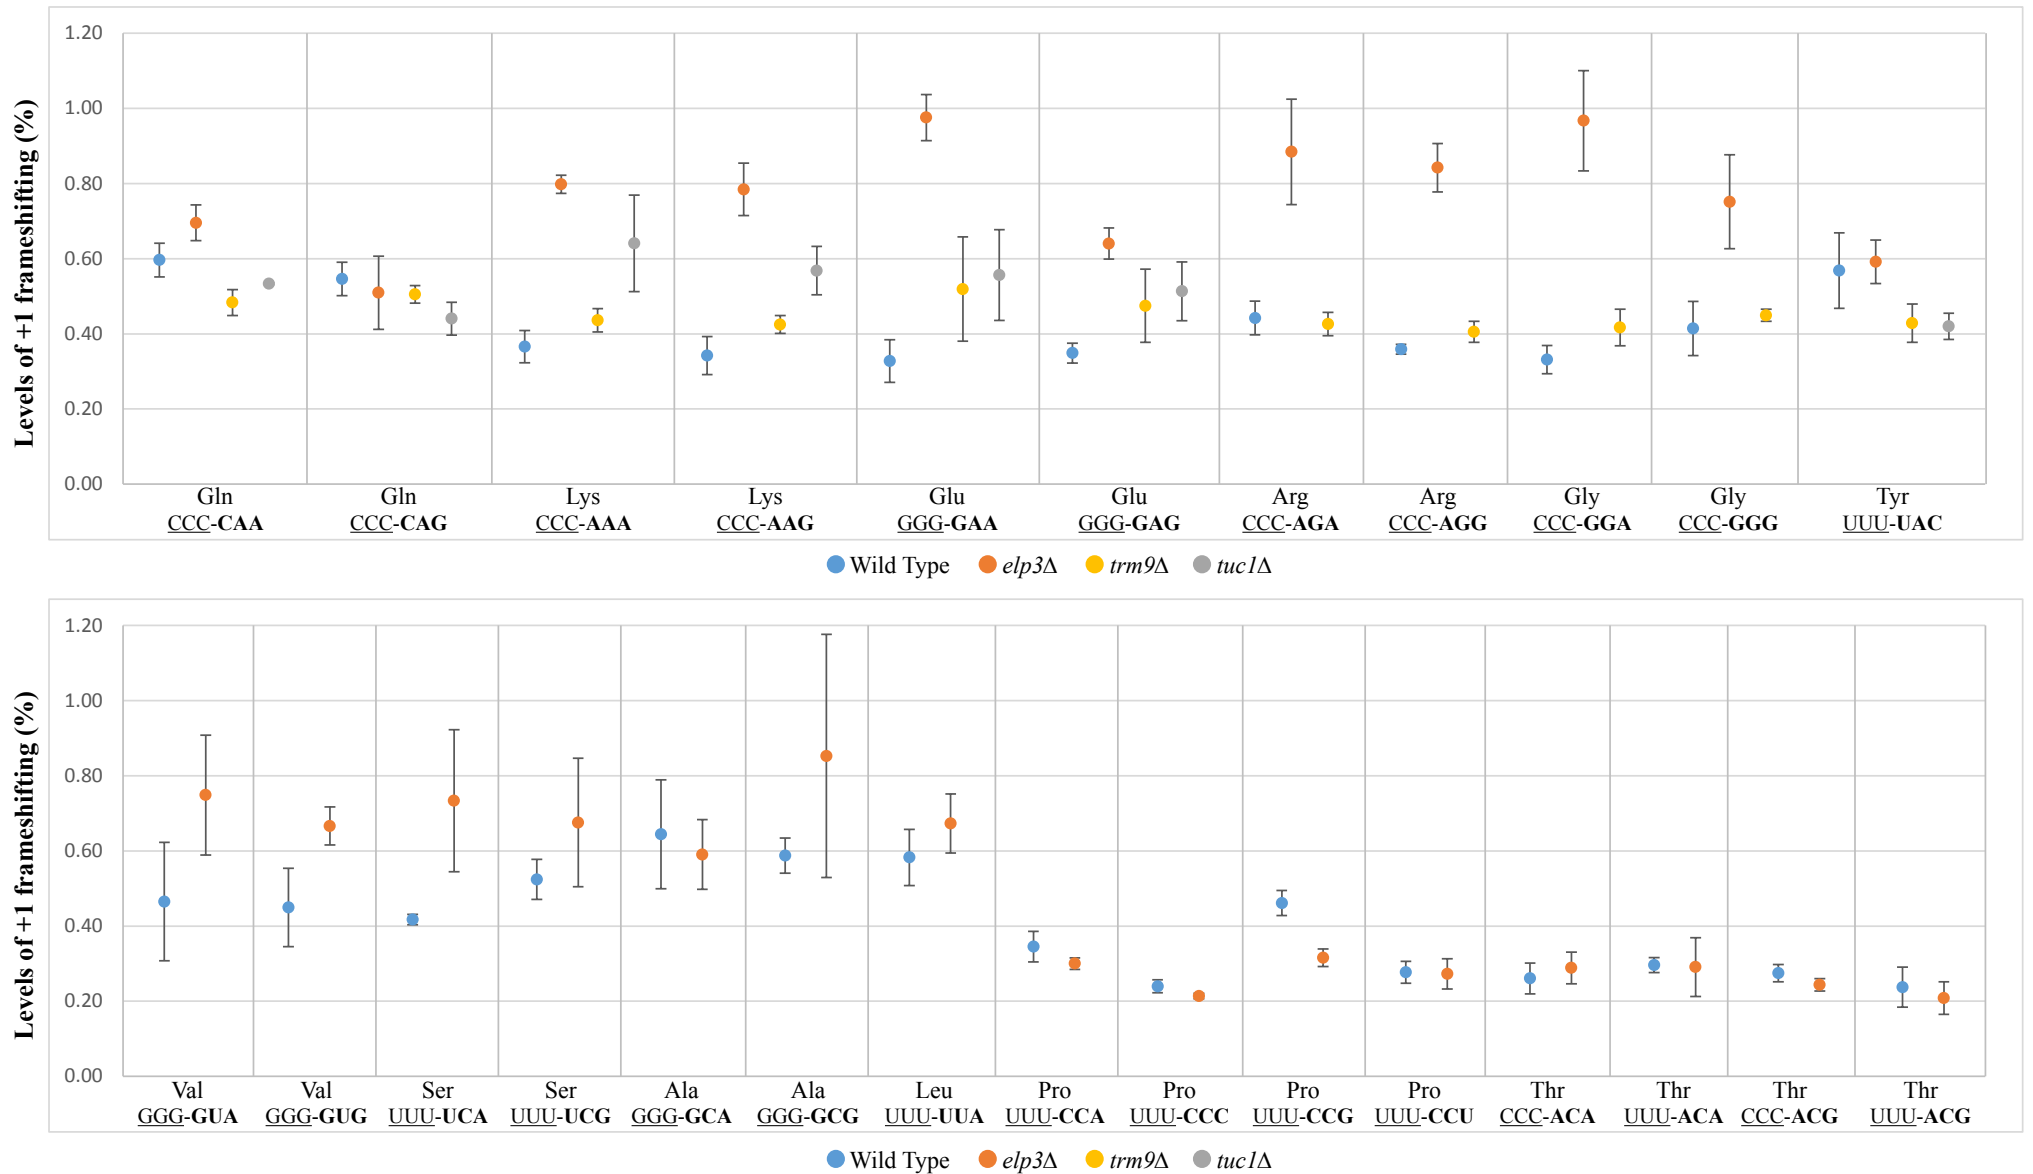

**Figure S1.** Levels of +1 frameshifting in the constructs with various A- or G- ending test codons decoded by tRNAs lacking the  $ncm^5$  group, the  $mcm^5$  group, the esterified methyl group of  $mcm^5$  or the  $s^2$  group at wobble position. Levels of +1 frameshifting were analyzed by using wild type (blue) and mutant strains (*elp3Δ*: red, *trm9Δ*: yellow, *tuc1Δ*: grey). Each frameshifting value is the mean of three biological replicates and the value of the each biological replicate is the median of three technical replicates. Slippery codons (XXX) are underlined and test codons (NNN) are in bold. Error bars were determined by standard deviation.

**Table S1.** Plasmids used for luciferase assay system.

| Plasmids | Fragments inserted between two luciferase genes <sup>a</sup> | tRNA assayed                                                   | Source     |
|----------|--------------------------------------------------------------|----------------------------------------------------------------|------------|
| ABY1830  | GGA.UCC.CCC.GGC.GAG.CUC                                      | In-frame control                                               | (40)       |
| ABY1843  | GGA.UCC.CUA.GGC.CCC.CAA.UAG.C.GAG.CUC                        | tRNA <sup>Gln</sup> <sub>mcm<sup>5</sup>s<sup>2</sup>UUG</sub> | This study |
| ABY1846  | GGA.UCC.CUA.GGC.CCC.CAG.UAG.C.GAG.CUC                        |                                                                | This study |
| ABY1844  | GGA.UCC.CUA.GGC.CCC.AAA.UAG.C.GAG.CUC                        | tRNA <sup>Lys</sup> <sub>mcm<sup>5</sup>s<sup>2</sup>UUU</sub> | This study |
| ABY1847  | GGA.UCC.CUA.GGC.CCC.AAG.UAG.C.GAG.CUC                        |                                                                | This study |
| ABY2049  | GGA.UCC.CUA.GGC.GGG.GAA.UAG.C.GAG.CUC                        | tRNA <sup>Glu</sup> <sub>mcm<sup>5</sup>s<sup>2</sup>UUC</sub> | This study |
| ABY1845  | GGA.UCC.CUA.GGC.GGG.GAG.UAG.C.GAG.CUC                        |                                                                | This study |
| ABY1838  | GGA.UCC.CUA.GGC.CCC.AGA.UAG.C.GAG.CUC                        | tRNA <sup>Arg</sup> <sub>mcm<sup>5</sup>UCU</sub>              | This study |
| ABY1839  | GGA.UCC.CUA.GGC.CCC.AGG.UAG.C.GAG.CUC                        |                                                                | This study |
| ABY1840  | GGA.UCC.CUA.GGC.CCC.GGA.UAG.C.GAG.CUC                        | tRNA <sup>Gly</sup> <sub>mcm<sup>5</sup>UCC</sub>              | This study |
| ABY1842  | GGA.UCC.CUA.GGC.CCC.GGG.UAG.C.GAG.CUC                        |                                                                | This study |
| ABY1837  | GGA.UCC.CUA.GGC.GGG.GUA.UAG.C.GAG.CUC                        | tRNA <sup>Val</sup> <sub>nem<sup>5</sup>UAC</sub>              | This study |
| ABY2007  | GGA.UCC.CUA.GGC.GGG.GUG.UAG.C.GAG.CUC                        |                                                                | This study |
| ABY2008  | GGA.UCC.CUA.GGC.UUU.UCA.UAG.C.GAG.CUC                        | tRNA <sup>Ser</sup> <sub>nem<sup>5</sup>UGA</sub>              | This study |
| ABY2009  | GGA.UCC.CUA.GGC.UUU.UCG.UAG.C.GAG.CUC                        |                                                                | This study |
| ABY1835  | GGA.UCC.CUA.GGC.GGG.GCA.UAG.C.GAG.CUC                        | tRNA <sup>Ala</sup> <sub>nem<sup>5</sup>UGC</sub>              | This study |
| ABY1836  | GGA.UCC.CUA.GGC.GGG.GCG.UAG.C.GAG.CUC                        |                                                                | This study |
| ABY2006  | GGA.UCC.CUA.GGC.UUU.UUA.UAG.C.GAG.CUC                        | tRNA <sup>Leu</sup> <sub>nem<sup>5</sup>UAA</sub>              | This study |
| ABY1833  | GGA.UCC.CUA.GGC.UUU.CCA.UAG.C.GAG.CUC                        | tRNA <sup>Pro</sup> <sub>nem<sup>5</sup>UGG</sub>              | This study |
| ABY1832  | GGA.UCC.CUA.GGC.UUU.CCC.UAG.C.GAG.CUC                        |                                                                | This study |
| ABY1834  | GGA.UCC.CUA.GGC.UUU.CCG.UAG.C.GAG.CUC                        |                                                                | This study |
| ABY1831  | GGA.UCC.CUA.GGC.UUU.CCU.UAG.C.GAG.CUC                        |                                                                | This study |
| ABY2048  | GGA.UCC.CUA.GGC.CCC.ACA.UAG.C.GAG.CUC                        | tRNA <sup>Thr</sup> <sub>nem<sup>5</sup>UGU</sub>              | This study |
| ABY2012  | GGA.UCC.CUA.GGC.UUU.ACA.UAG.C.GAG.CUC                        |                                                                | This study |
| ABY2011  | GGA.UCC.CUA.GGC.CCC.ACG.UAG.C.GAG.CUC                        |                                                                | This study |
| ABY2013  | GGA.UCC.CUA.GGC.UUU.ACG.UAG.C.GAG.CUC                        |                                                                | This study |
| ABY2014  | GGA.UCC.CUA.GGC.UUU.UAC.UAG.C.GAG.CUC                        | tRNA <sup>Tyr</sup> <sub>GUA</sub>                             | This study |

<sup>a</sup> Restriction sites *Bam*HI-*Sac*I are marked with dotted line. Slippery codons are in bold and test codons are in bold and underlined.

**Table S2.** Oligonucleotides used to alter the Ty1 sequence of plasmids pMB38-9merWT and pMB38-9merFF.

| Plasmids             | Template <sup>a</sup>                      | Oligonucleotides used for PCR directed mutagenesis (5' to 3') <sup>b</sup> | tRNA assayed                                                      | Source     |
|----------------------|--------------------------------------------|----------------------------------------------------------------------------|-------------------------------------------------------------------|------------|
| ABY2138              | pMB38-9merWT<br>Test Construct             | CCGCTGACA( <b>CTT</b> )( <b>AGA</b> )CCATGAGGTACCCG'                       | tRNA <sub>mcm<sup>5</sup></sub> <sup>Arg</sup> UCU                | This study |
| ABY2139              |                                            | CTCGACGGATCCGCTGACA( <b>CTT</b> )( <b>AAA</b> )CCATGAGGTACC                | tRNA <sub>mcm<sup>5</sup></sub> <sup>Lys</sup> s <sup>2</sup> UUU | This study |
| ABY2140 <sup>c</sup> |                                            | GGCTCGACGGATCCGCTGACA( <b>AAA</b> )( <b>AGG</b> )CATGAGG                   | tRNA <sub>mcm<sup>5</sup></sub> <sup>Lys</sup> s <sup>2</sup> UUU | This study |
| ABY2141 <sup>c</sup> |                                            | GATGGCTCGACGGATCCGCTGACA( <b>AAA</b> )( <b>CGT</b> )CCATGAGGTACCCGA'       | tRNA <sub>mcm<sup>5</sup></sub> <sup>Lys</sup> s <sup>2</sup> UUU | This study |
| ABY2142 <sup>c</sup> |                                            | GGATGGCTCGACGGATCCGCTGACA( <b>AAA</b> )( <b>ATT</b> )CCATGAGGTACCCGAT      | tRNA <sub>mcm<sup>5</sup></sub> <sup>Lys</sup> s <sup>2</sup> UUU | This study |
| ABY2143              | pMB38-9merFF<br>In-frame Control Construct | CCGCTGACA( <b>CTT</b> )( <b>AGA</b> )CCACGTGAGGTACC                        | tRNA <sub>mcm<sup>5</sup></sub> <sup>Arg</sup> UCU                | This study |
| ABY2144              |                                            | CGACGGATCCGCTGACA( <b>CTT</b> )( <b>AAA</b> )CCACGTGAGGT                   | tRNA <sub>mcm<sup>5</sup></sub> <sup>Lys</sup> s <sup>2</sup> UUU | This study |
| ABY2145 <sup>c</sup> |                                            | GGCTCGACGGATCCGCTGACA( <b>AAA</b> )( <b>AGG</b> )CCACGTGA                  | tRNA <sub>mcm<sup>5</sup></sub> <sup>Lys</sup> s <sup>2</sup> UUU | This study |
| ABY2146 <sup>c</sup> |                                            | GGATGGCTCGACGGATCCGCTGACA( <b>AAA</b> )( <b>CGT</b> )CCACGTGAGGTAC         | tRNA <sub>mcm<sup>5</sup></sub> <sup>Lys</sup> s <sup>2</sup> UUU | This study |
| ABY2147 <sup>c</sup> |                                            | TTGGATGGCTCGACGGATCCGCTGACA( <b>AAA</b> )( <b>ATT</b> )CCACGTGAGGTACC      | tRNA <sub>mcm<sup>5</sup></sub> <sup>Lys</sup> s <sup>2</sup> UUU | This study |

<sup>a</sup> pMB38-9merWT (test construct) and pMB38-9merFF (in-frame control construct) plasmids carrying the Ty1 sequence (CTT-AGG-C) were used as templates for the PCR mutagenesis (41).

<sup>b</sup> Alterations of the Ty1 sequence are labelled in bold.

<sup>c</sup> Constructs to test the P-site induced frameshifting.
